# Supplementary material
Source: PubMed Central journal article supplement (PMC1544248)

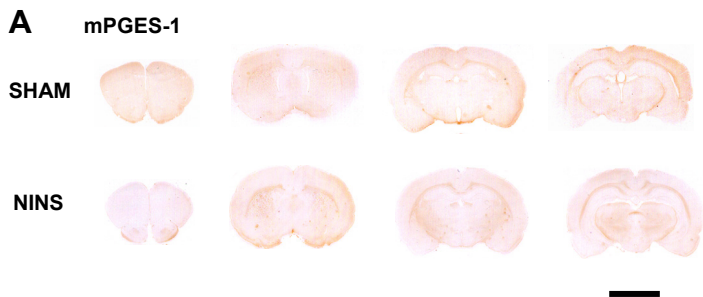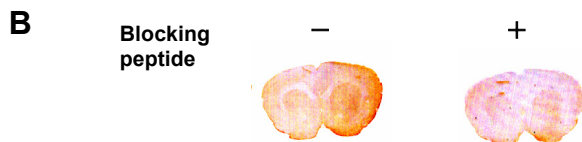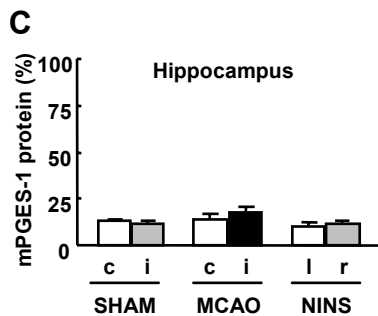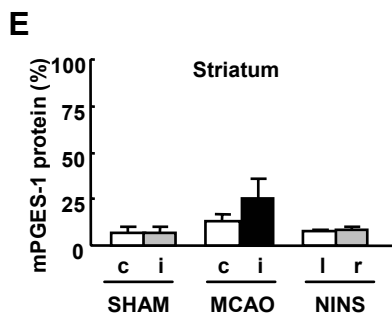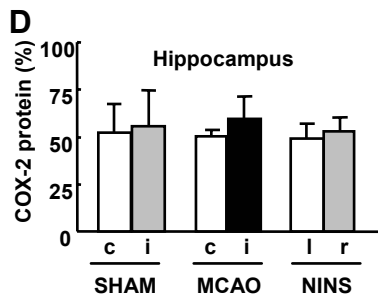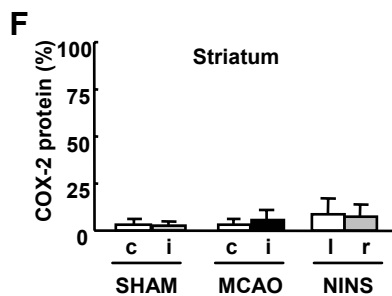

Supplement: pnas_0604400103_1.pdf [file pnas_0604400103_1.pdf]

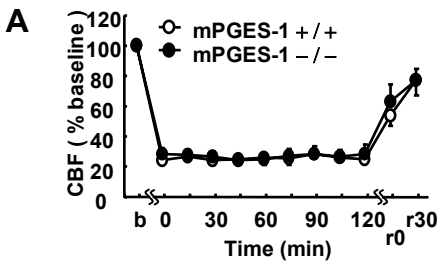

**B**

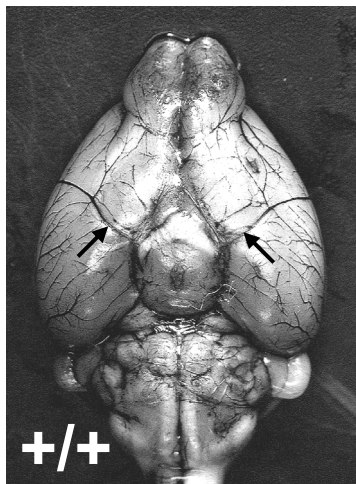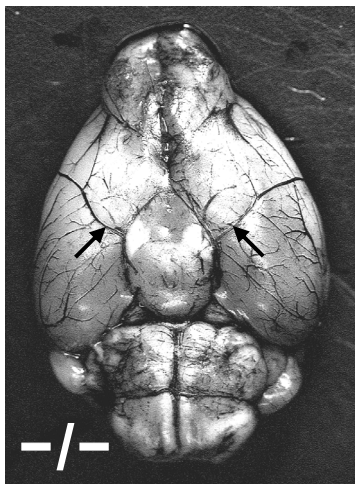

Supplement: pnas_0604400103_2.pdf [file pnas_0604400103_2.pdf]
